# Supplementary material for: A memory-efficient dynamic programming algorithm for optimal alignment of a sequence to an RNA secondary structure
Source: Springer Nature journal article supplement (doi:10.1186/1471-2105-3-18), 2002-07-02

input multiple alignment:

```
[structure] . x x > > > x x x x < x < < x > > x > . x x x . < < < .  
human      . A A G A C U U C G G A U C U G G C G . A C A . C C C .  
mouse     a U A C A C U U C G G A U G - C A C C . A A A . G U G a  
orc       . A G G U C U U C - G C A C G G G C A g C C A c U U C .  
          1         5         10        15        20        25        28
```

example structure:

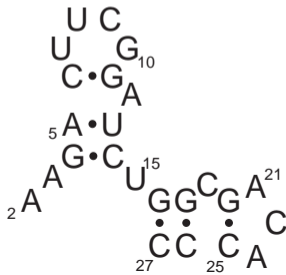

Supplement: 12859_2002_28_MOESM1_ESM.pdf [file 12859_2002_28_MOESM1_ESM.pdf]
