# Supplementary material for: A memory-efficient dynamic programming algorithm for optimal alignment of a sequence to an RNA secondary structure
Source: Springer Nature journal article supplement (doi:10.1186/1471-2105-3-18), 2002-07-02
Supplement: 12859_2002_28_MOESM3_ESM.pdf [file 12859_2002_28_MOESM3_ESM.pdf]

"split set"

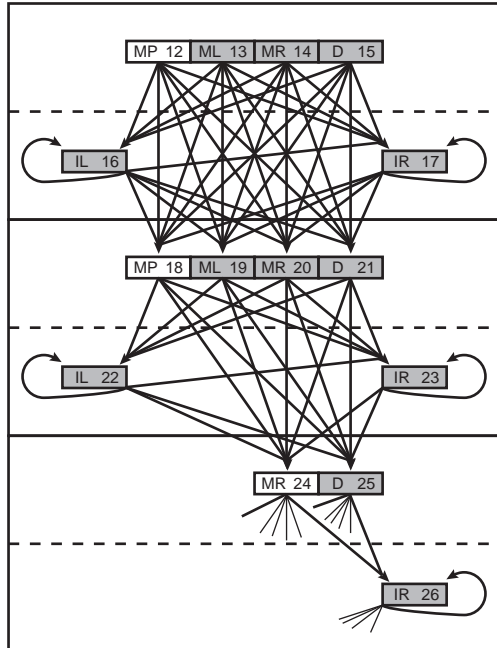

**MATP 6**

**MATP 7**

**MATR 8**

|    |    |                |
|----|----|----------------|
| S  | 1  |                |
| IL | 2  | <b>ROOT 1</b>  |
| IR | 3  |                |
| ML | 4  |                |
| D  | 5  | <b>MATL 2</b>  |
| IL | 6  |                |
| ML | 7  |                |
| D  | 8  | <b>MATL 3</b>  |
| IL | 9  |                |
| B  | 10 | <b>BIF 4</b>   |
| S  | 11 | <b>BEGL 5</b>  |
| MP | 12 |                |
| ML | 13 |                |
| MR | 14 |                |
| D  | 15 | <b>MATP 6</b>  |
| IL | 16 |                |
| IR | 17 |                |
| MP | 18 |                |
| ML | 19 |                |
| MR | 20 |                |
| D  | 21 | <b>MATP 7</b>  |
| IL | 22 |                |
| IR | 23 |                |
| MR | 24 |                |
| D  | 25 | <b>MATR 8</b>  |
| IR | 26 |                |
| ML | 27 |                |
| ML | 28 |                |
| MR | 29 |                |
| D  | 30 | <b>MATP 9</b>  |
| IL | 31 |                |
| IR | 32 |                |
| ML | 33 |                |
| D  | 34 | <b>MATL 10</b> |
| IL | 35 |                |
| ML | 36 |                |
| D  | 37 | <b>MATL 11</b> |
| IL | 38 |                |
| ML | 39 |                |
| D  | 40 | <b>MATL 12</b> |
| IL | 41 |                |
| ML | 42 |                |
| D  | 43 | <b>MATL 13</b> |
| IL | 44 |                |
| E  | 45 | <b>END 14</b>  |
| S  | 46 | <b>BEGR 15</b> |
| IL | 47 |                |
| ML | 48 |                |
| D  | 49 | <b>MATL 16</b> |
| IL | 50 |                |
| MP | 51 |                |
| ML | 52 |                |
| MR | 53 |                |
| D  | 54 | <b>MATP 17</b> |
| IL | 55 |                |
| IR | 56 |                |
| MP | 57 |                |
| ML | 58 |                |
| MR | 59 |                |
| D  | 60 | <b>MATP 18</b> |
| IL | 61 |                |
| IR | 62 |                |
| ML | 63 |                |
| D  | 64 | <b>MATL 19</b> |
| IL | 65 |                |
| MP | 66 |                |
| ML | 67 |                |
| MR | 68 |                |
| D  | 69 | <b>MATP 20</b> |
| IL | 70 |                |
| IR | 71 |                |
| ML | 72 |                |
| D  | 73 | <b>MATL 21</b> |
| IL | 74 |                |
| ML | 75 |                |
| D  | 76 | <b>MATL 22</b> |
| IL | 77 |                |
| ML | 78 |                |
| D  | 79 | <b>MATL 23</b> |
| IL | 80 |                |
| E  | 81 | <b>END 24</b>  |
