# Supplementary material for: A memory-efficient dynamic programming algorithm for optimal alignment of a sequence to an RNA secondary structure
Source: Springer Nature journal article supplement (doi:10.1186/1471-2105-3-18), 2002-07-02

human:

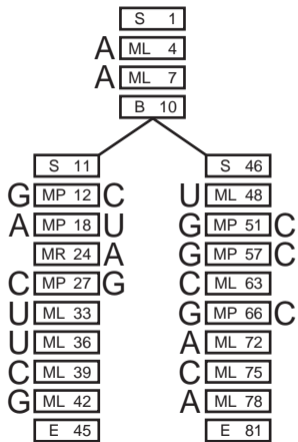

mouse:

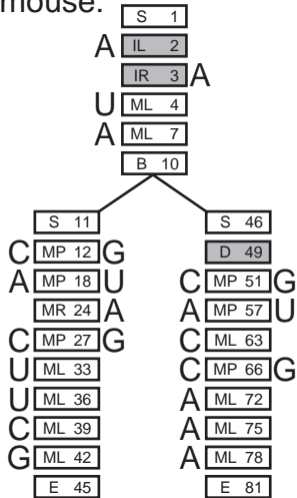

orc:

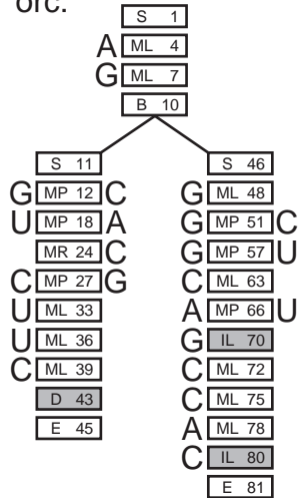

Supplement: 12859_2002_28_MOESM4_ESM.pdf [file 12859_2002_28_MOESM4_ESM.pdf]
