# Supplementary material for: A memory-efficient dynamic programming algorithm for optimal alignment of a sequence to an RNA secondary structure
Source: Springer Nature journal article supplement (doi:10.1186/1471-2105-3-18), 2002-07-02
Supplement: 12859_2002_28_MOESM5_ESM.pdf [file 12859_2002_28_MOESM5_ESM.pdf]

**generic\_splitter**  
( $r,z; g,q$ )

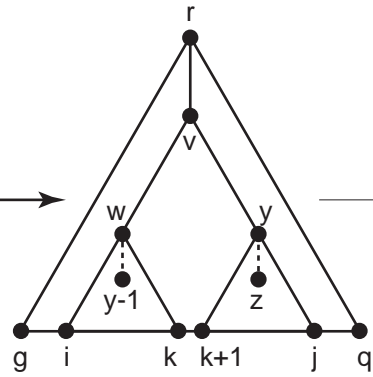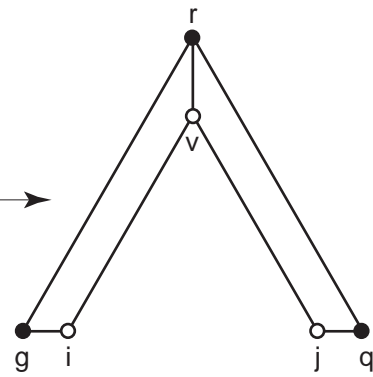

**V**  
( $r,v; g,i; j,q$ ),

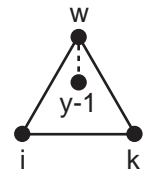

**generic**  
( $w,y-1; i,k$ ),

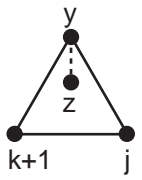

**generic**  
( $y,z; k+1,j$ )

(no B in r..z)

**wedge\_splitter**  
( $r,z; g,q$ )

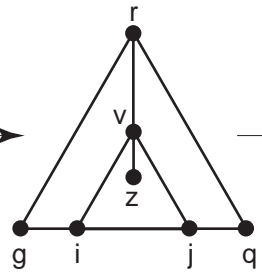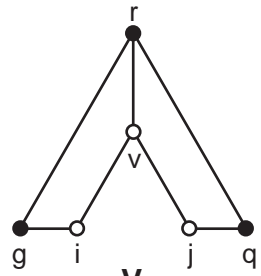

**V**  
( $r,v; g,i; j,q$ ),

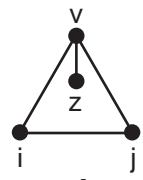

**wedge**  
( $v,z; i,j$ )

**V\_splitter**  
( $r,z; g,h; p,q$ )

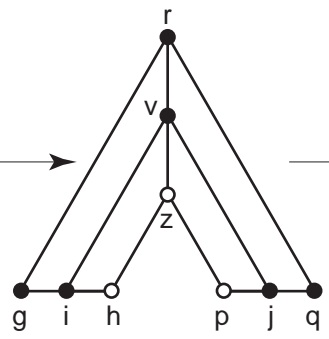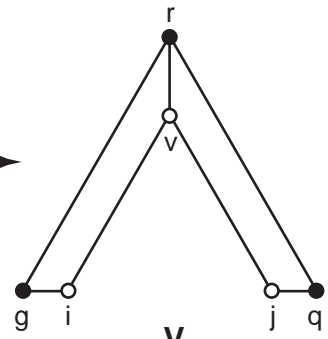

**V**  
( $r,v; g,i; j,q$ ),

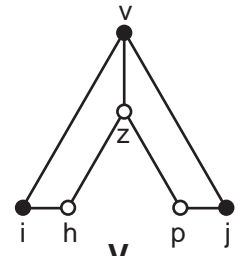

**V**  
( $v,z; i,h; p,j$ )
